# Supplementary material for: Mycobacterium tuberculosis Drug Resistance in Ethiopia: An Updated Systematic Review and Meta-Analysis
Source: MDPI journal article supplement (doi:10.3390/tropicalmed7100300), 2022-10-14
Supplement: s1 [file s1]

**Supplementary Figures:** Funnel plots, and the Egger's test result, which shows a publication bias, and the sensitivity analysis of included papers during this meta-analysis to estimate the weighted pooled prevalence of any anti-TB drug resistance, any-INH and RIF resistance, INH and RIF-monoresistance, and MDR rate among TB patients in Ethiopia.

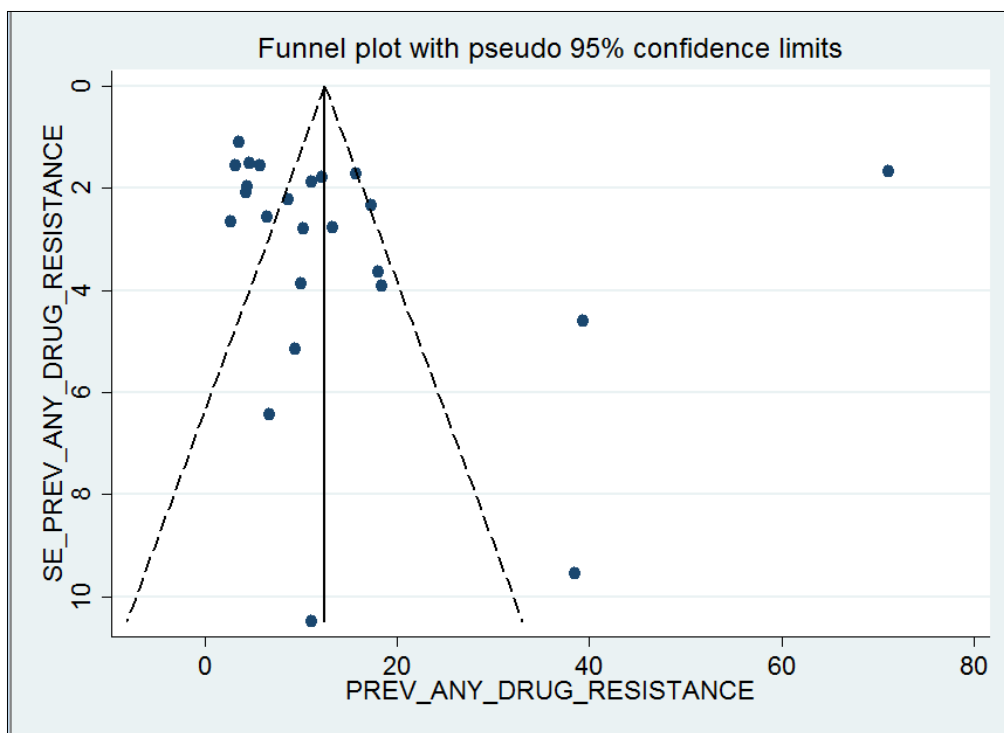

**Figure S1A.** Funnel plot for publication bias, PREV (prevalence) of any anti-TB resistance represented in the x-axis and SE (standard error) of the prevalence of any anti-TB drug resistance in the y-axis.

Tests for Publication Bias

Begg's Test

adj. Kendall's Score (P-Q) = 104  
 Std. Dev. of Score = 40.32  
 Number of Studies = 24  
 z = 2.58  
 Pr > |z| = 0.010  
 z = 2.55 (continuity corrected)  
 Pr > |z| = 0.011 (continuity corrected)

Egger's test

| Std_Eff | Coef.    | Std. Err. | t    | P> t  | [95% Conf. Interval] |          |
|---------|----------|-----------|------|-------|----------------------|----------|
| slope   | 9.066489 | 8.442159  | 1.07 | 0.294 | -8.441477            | 26.57445 |
| bias    | 1.754792 | 3.896781  | 0.45 | 0.657 | -6.326638            | 9.836222 |

**Figure S1B.** The results of Begg's and Egger's tests for publication bias in estimating the weighted pooled prevalence of any anti-TB drug resistance.

| Meta-analysis |            |        |        |            |         |                |
|---------------|------------|--------|--------|------------|---------|----------------|
| Method        | Pooled Est | 95% CI |        | Asymptotic |         | No. of studies |
|               |            | Lower  | Upper  | z_value    | p_value |                |
| Fixed         | 12.501     | 11.634 | 13.368 | 28.269     | 0.000   | 24             |
| Random        | 14.248     | 7.053  | 21.443 | 3.881      | 0.000   |                |

Test for heterogeneity: Q= 1486.500 on 23 degrees of freedom (p= 0.000)  
Moment-based estimate of between studies variance = 308.528

Trimming estimator: **Linear**  
Meta-analysis type: **Random-effects model**

| iteration | estimate | Tn | # to trim | diff |
|-----------|----------|----|-----------|------|
| 1         | 14.248   | 91 | 0         | 300  |
| 2         | 14.248   | 91 | 0         | 0    |

Note: no trimming performed; data unchanged

Filled  
Meta-analysis

| Method | Pooled Est | 95% CI |        | Asymptotic |         | No. of studies |
|--------|------------|--------|--------|------------|---------|----------------|
|        |            | Lower  | Upper  | z_value    | p_value |                |
| Fixed  | 12.501     | 11.634 | 13.368 | 28.269     | 0.000   | 24             |
| Random | 14.248     | 7.053  | 21.443 | 3.881      | 0.000   |                |

Test for heterogeneity: Q= 1486.500 on 23 degrees of freedom (p= 0.000)  
Moment-based estimate of between studies variance = 308.528

**Figure S1C.** The trim and fill analysis result for publication bias, in estimating the weighted pooled prevalence of any anti-TB drug resistance.

| Study omitted       | Coef.     | [95% Conf. Interval] |           |
|---------------------|-----------|----------------------|-----------|
| Abate et al         | 10.634086 | 7.9720407            | 13.296131 |
| Alealign et al      | 14.0863   | 6.6789632            | 21.493637 |
| Bedewi Omer et al   | 14.399507 | 6.818614             | 21.9804   |
| Bekele et al        | 14.503662 | 6.9925523            | 22.014772 |
| Biadglegne et al    | 14.452383 | 7.0763793            | 21.828386 |
| Biadglegne et al    | 14.641706 | 7.0067387            | 22.276674 |
| Brhane et al        | 14.069606 | 6.6709189            | 21.468292 |
| Damena et al        | 14.294627 | 6.8358917            | 21.753363 |
| Diriba et al        | 14.350941 | 6.7483902            | 21.953491 |
| Ejeta et al         | 14.691198 | 7.0650153            | 22.317381 |
| Fanosie et al       | 14.766131 | 7.3321872            | 22.200075 |
| Gebrehiwet et al    | 14.701543 | 7.2006269            | 22.202459 |
| Gizachew Beza et al | 14.352984 | 7.0293779            | 21.676592 |
| Habte et al         | 14.693904 | 7.1746988            | 22.213108 |
| Haile et al         | 14.598554 | 7.1353321            | 22.061775 |
| Jaleta et al        | 14.189034 | 6.5761285            | 21.801937 |
| Mulu et al          | 14.427903 | 6.9720283            | 21.883778 |
| Sinshaw et al       | 13.4011   | 6.0882068            | 20.713995 |
| Tadesse et al       | 14.747752 | 6.9784369            | 22.517067 |
| Tadesse et al       | 13.178613 | 5.8748507            | 20.482374 |
| Tessema et al       | 14.117094 | 6.6266594            | 21.607529 |
| Wondale et al       | 14.757228 | 7.1728797            | 22.341576 |
| Workalemahu et al   | 14.551004 | 7.1934738            | 21.908535 |
| Zewdie et al        | 14.434855 | 7.0303683            | 21.839342 |

**Figure S1D.** Results of a sensitivity analysis assessing the between-study heterogeneity, in estimating the weighted pooled prevalence of any anti-TB drug resistance.

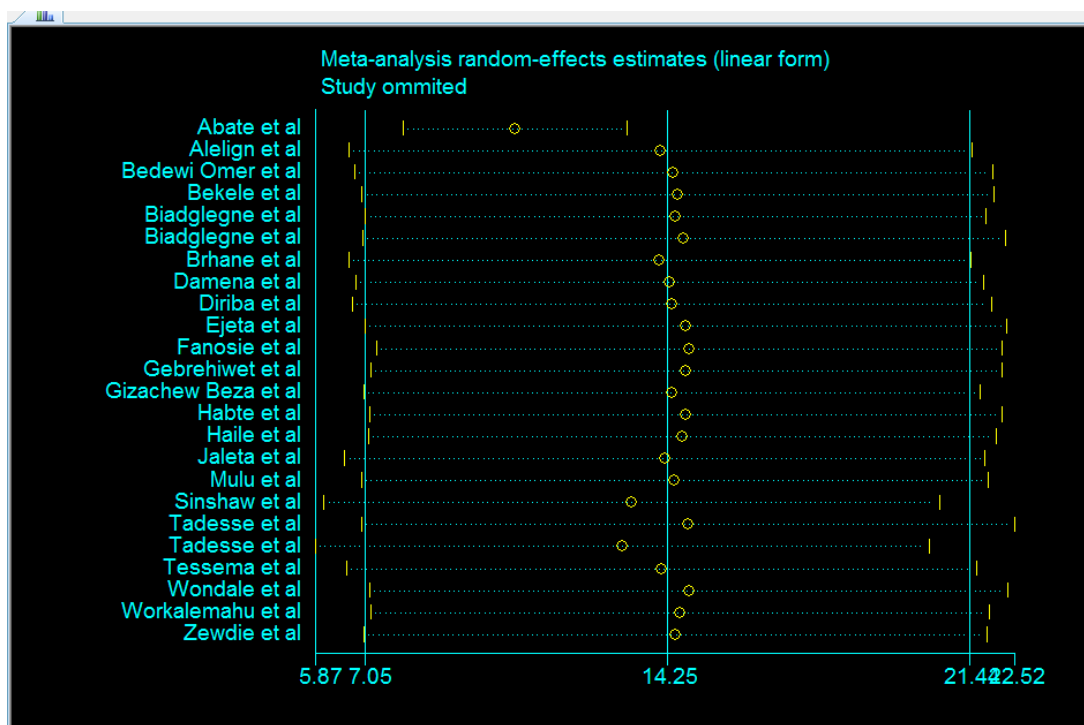

Figure S1E. Results of a sensitivity analysis assessing the between-study heterogeneity in estimating the weighted pooled prevalence of any anti-TB drug resistance.

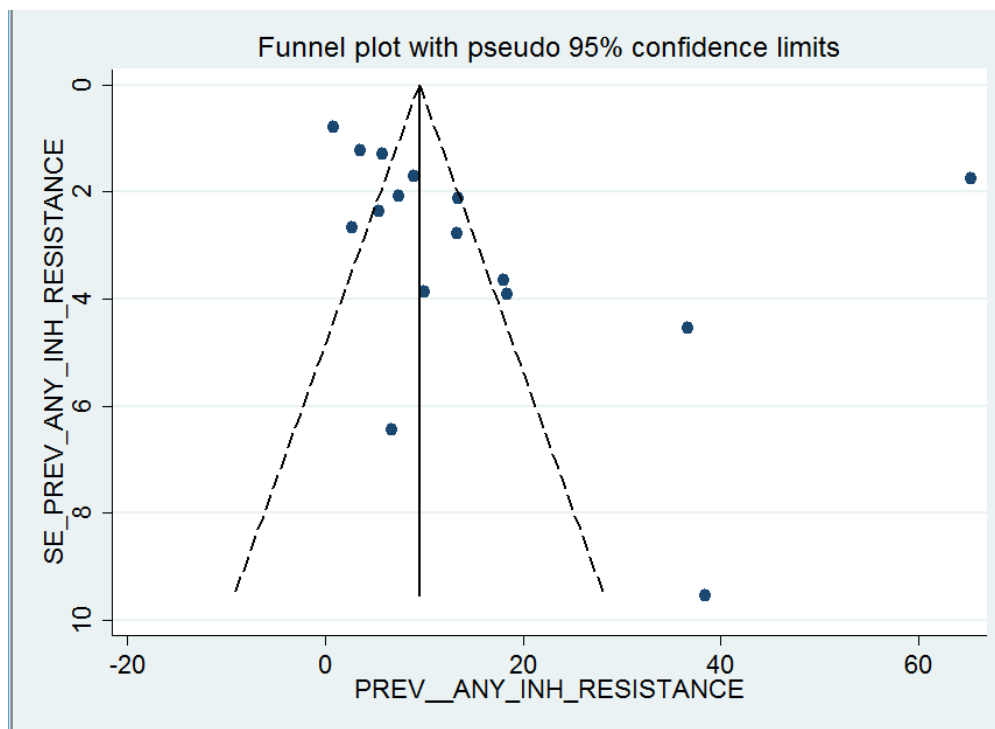

Figure S2A. Funnel plot for publication bias, PREV (prevalence) of any INH resistance represented in the x-axis and SE (standard error) of the prevalence of any INH resistance in the y-axis.

| Tests for Publication Bias              |          |           |      |       |                      |          |
|-----------------------------------------|----------|-----------|------|-------|----------------------|----------|
| Begg's Test                             |          |           |      |       |                      |          |
| adj. Kendall's Score (P-Q) = 56         |          |           |      |       |                      |          |
| Std. Dev. of Score = 22.21              |          |           |      |       |                      |          |
| Number of Studies = 16                  |          |           |      |       |                      |          |
| z = 2.52                                |          |           |      |       |                      |          |
| Pr >  z  = 0.012                        |          |           |      |       |                      |          |
| z = 2.48 (continuity corrected)         |          |           |      |       |                      |          |
| Pr >  z  = 0.013 (continuity corrected) |          |           |      |       |                      |          |
| Egger's test                            |          |           |      |       |                      |          |
| Std_Eff                                 | Coef.    | Std. Err. | t    | P> t  | [95% Conf. Interval] |          |
| slope                                   | .9842021 | 7.772881  | 0.13 | 0.901 | -15.68697            | 17.65537 |
| bias                                    | 5.440917 | 4.225539  | 1.29 | 0.219 | -3.621963            | 14.5038  |

Figure S2B. The results of Begg's and Egger's tests for publication bias, in estimating the weighted pooled prevalence of any INH resistance.

| Study omitted     | Coef.     | [95% Conf. Interval] |           |
|-------------------|-----------|----------------------|-----------|
| Abate et al       | 10.766405 | 7.251575             | 14.281235 |
| Alelign et al     | 15.465397 | 6.2448821            | 24.685913 |
| Bedewi Omer et al | 16.105616 | 6.4984732            | 25.712759 |
| Bekele et al      | 16.199331 | 6.7429733            | 25.655689 |
| Biadlegne et al   | 16.497324 | 6.5698962            | 26.424751 |
| Brhane et al      | 15.442509 | 6.2353711            | 24.649647 |
| Damena et al      | 15.786048 | 6.4752922            | 25.096804 |
| Diriba et al      | 16.342102 | 6.4232349            | 26.260971 |
| Fanosie et al     | 16.509405 | 7.2008076            | 25.818003 |
| Haile et al       | 16.330784 | 6.955256             | 25.706314 |
| Sinshaw et al     | 14.405824 | 5.3408899            | 23.470758 |
| Tadesse et al     | 14.250112 | 5.1818862            | 23.318336 |
| Tessema et al     | 15.78552  | 6.3537946            | 25.217245 |
| Wondale et al     | 16.695992 | 6.6193614            | 26.772621 |
| Workalemahu et al | 16.169519 | 7.0207782            | 25.318262 |
| Zewdie et al      | 15.998906 | 6.7708254            | 25.226986 |
| Combined          | 15.620452 | 6.7724494            | 24.468454 |

Figure S2C. Results of a sensitivity analysis assessing the between-study heterogeneity in estimating the weighted pooled prevalence of any INH resistance.

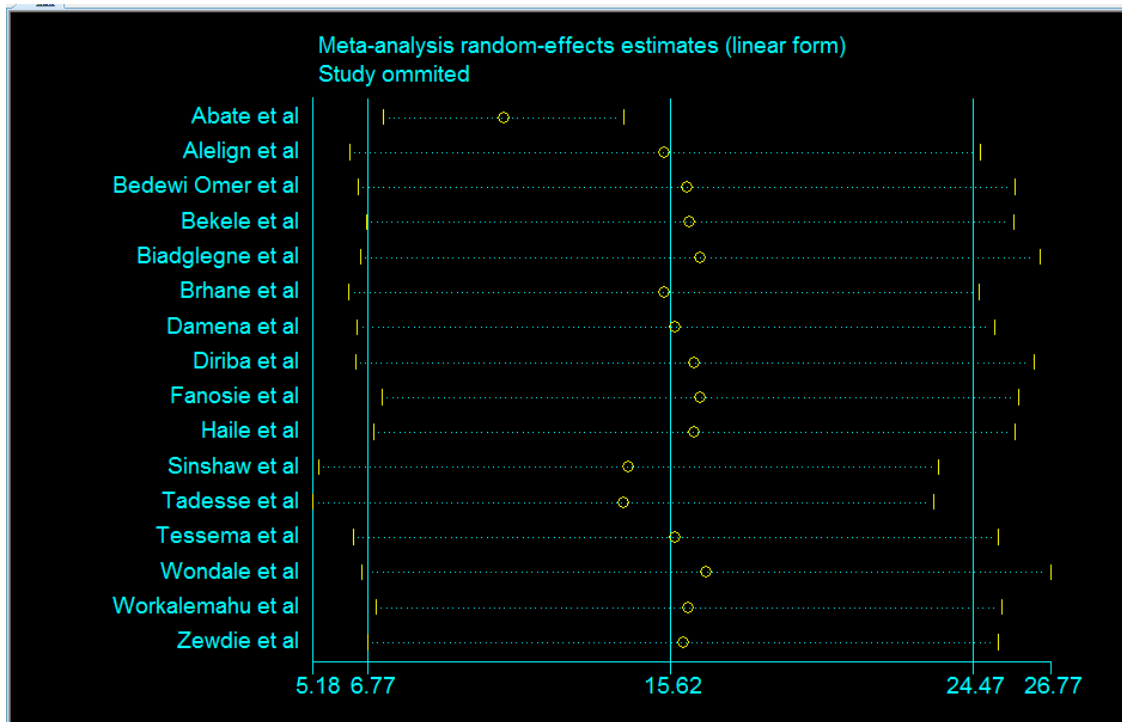

Figure S2D. Results of a sensitivity analysis assessing the between-study heterogeneity in estimating the weighted pooled prevalence of any INH resistance.

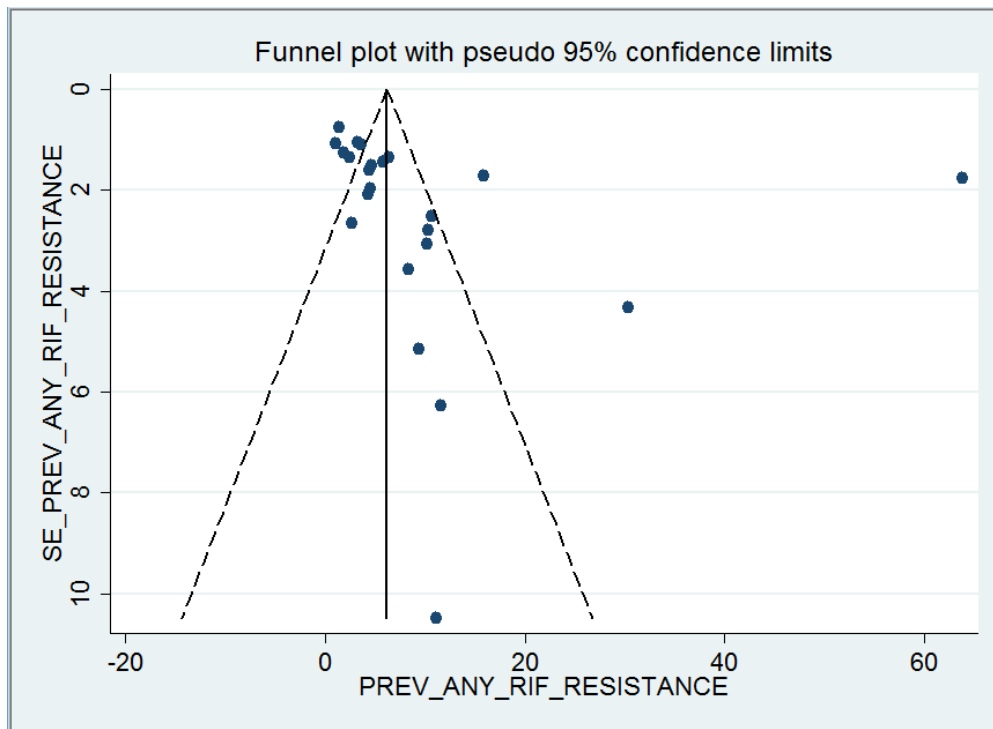

Figure S3A. Funnel plot for publication bias, PREV (prevalence) of any RIF resistance represented in the x-axis and SE (standard error) of the prevalence of any RIF resistance in the y-axis.

| Std_Eff | Coef.     | Std. Err. | t     | P> t  | [95% Conf. Interval] |          |
|---------|-----------|-----------|-------|-------|----------------------|----------|
| slope   | -.3606184 | 5.206953  | -0.07 | 0.945 | -11.18907            | 10.46783 |
| bias    | 4.6605    | 3.289899  | 1.42  | 0.171 | -2.18122             | 11.50222 |

**Figure S3B.** The results of Begg's and Egger's tests for publication bias, in estimating the weighted pooled prevalence of any RIF resistance.

| Study                      | ES     | [95% Conf. Interval] |        | % weight |
|----------------------------|--------|----------------------|--------|----------|
| Abate et al (2014)         | 63.860 | 60.391               | 67.329 | 4.53     |
| Alelign et al (2019)       | 1.800  | -0.670               | 4.270  | 4.58     |
| Bedewi Omer et al (2019)   | 3.230  | 1.152                | 5.308  | 4.60     |
| Bekele et al (2018)        | 4.350  | 1.194                | 7.506  | 4.55     |
| Biadglegne et al (2019)    | 9.380  | -0.714               | 19.474 | 3.91     |
| Biadglegne et al (2020)    | 1.330  | -0.160               | 2.820  | 4.61     |
| Brhane et al (2017)        | 10.200 | 4.203                | 16.197 | 4.35     |
| Damena et al (2019)        | 10.670 | 5.731                | 15.609 | 4.44     |
| Diriba et al (2019)        | 6.380  | 3.734                | 9.026  | 4.57     |
| Ejeta et al (2018)         | 4.660  | 1.681                | 7.639  | 4.56     |
| Fanosie et al (2016)       | 2.700  | -2.533               | 7.933  | 4.41     |
| Gebrehiwet et al (2019)    | 4.260  | 0.183                | 8.337  | 4.50     |
| Gizachew Beza et al (2019) | 11.110 | -9.430               | 31.650 | 2.63     |
| Habte et al (2016)         | 4.500  | 0.639                | 8.361  | 4.51     |
| Haile et al (2020)         | 1.090  | -1.027               | 3.207  | 4.59     |
| Jaleta et al (2017)        | 15.850 | 12.459               | 19.241 | 4.54     |
| Mulu et al (2017)          | 10.260 | 4.772                | 15.748 | 4.39     |
| Sinshaw et al (2019)       | 11.540 | -0.749               | 23.829 | 3.64     |
| Tadesse et al (2017)       | 3.580  | 1.404                | 5.756  | 4.59     |
| Tadesse et al (2016)       | 30.360 | 21.854               | 38.866 | 4.10     |
| Tessema et al (2012)       | 5.770  | 2.928                | 8.612  | 4.56     |
| Wondale et al (2018)       | 2.380  | -0.286               | 5.046  | 4.57     |
| Zewdie et al (2018)        | 8.330  | 1.333                | 15.327 | 4.26     |
| D+L pooled ES              | 9.754  | 4.687                | 14.821 | 100.00   |

**Figure S3C.** Results of a sensitivity analysis assessing the between-study heterogeneity in estimating the weighted pooled prevalence of any RIF resistance.

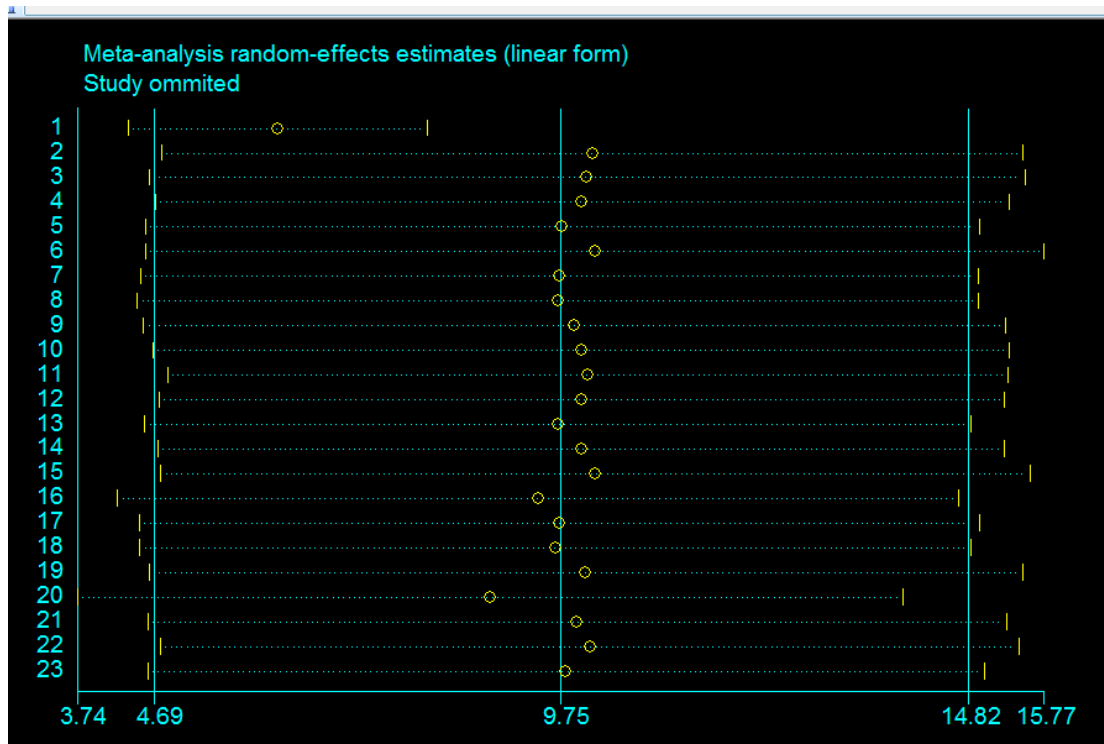

Figure S3D. Results of a sensitivity analysis assessing the between-study heterogeneity in estimating the weighted pooled prevalence of any RIF resistance.

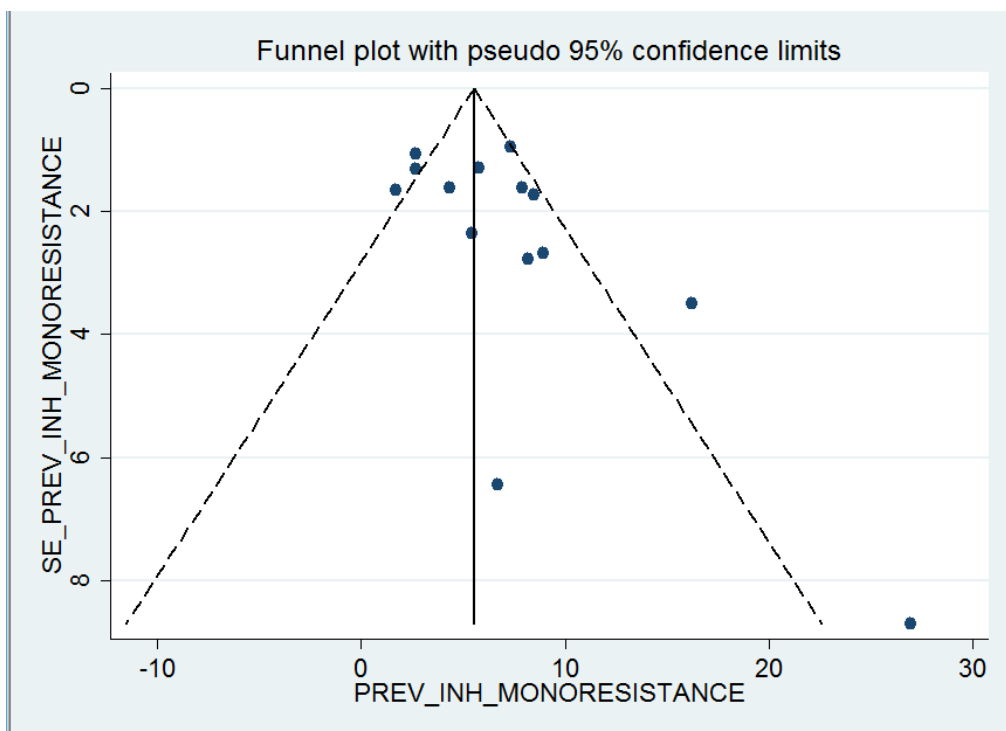

Figure S4A. Funnel plot for publication bias, PREV (prevalence) of INH-mono-resistance represented in the x-axis and SE (standard error) of the prevalence of INH-mono-resistance in the y-axis.

| Tests for Publication Bias   |          |                        |      |       |                      |          |
|------------------------------|----------|------------------------|------|-------|----------------------|----------|
| Begg's Test                  |          |                        |      |       |                      |          |
| adj. Kendall's Score (P-Q) = | 26       |                        |      |       |                      |          |
| Std. Dev. of Score =         | 18.24    | (corrected for ties)   |      |       |                      |          |
| Number of Studies =          | 14       |                        |      |       |                      |          |
| z =                          | 1.43     |                        |      |       |                      |          |
| Pr >  z  =                   | 0.154    |                        |      |       |                      |          |
| z =                          | 1.37     | (continuity corrected) |      |       |                      |          |
| Pr >  z  =                   | 0.170    | (continuity corrected) |      |       |                      |          |
| Egger's test                 |          |                        |      |       |                      |          |
| Std_Eff                      | Coef.    | Std. Err.              | t    | P> t  | [95% Conf. Interval] |          |
| slope                        | 2.644842 | 1.693552               | 1.56 | 0.144 | -1.045092            | 6.334776 |
| bias                         | 1.945293 | 1.02949                | 1.89 | 0.083 | -.2977735            | 4.18836  |

**Figure S4B.** The results of Begg's and Egger's tests for publication bias, in estimating the weighted pooled prevalence of INH-mono-resistance.

| Study omitted     | Coef.            | [95% Conf. Interval] |                  |
|-------------------|------------------|----------------------|------------------|
| Abate et al       | 6.1597729        | 4.1907721            | 8.1287737        |
| Alelign et al     | 5.7031174        | 4.0515203            | 7.3547144        |
| Bedewi Omer et al | 6.0966754        | 4.1926084            | 8.000742         |
| Bekele et al      | 6.4611177        | 4.5183749            | 8.4038601        |
| Biadglegne et al  | 6.6141939        | 4.7760353            | 8.4523525        |
| Brhane et al      | 6.1300974        | 4.2667284            | 7.9934669        |
| Damena et al      | 6.6073847        | 4.7325659            | 8.4822035        |
| Diriba et al      | 6.3603587        | 4.3626413            | 8.3580761        |
| Haile et al       | 6.3239965        | 4.4235148            | 8.2244787        |
| Sinshaw et al     | 5.9727831        | 4.2795935            | 7.6659727        |
| Tadesse et al     | 6.0693555        | 4.2182636            | 7.9204478        |
| Tessema et al     | 6.0341825        | 4.1583228            | 7.9100423        |
| Workalemahu et al | 6.2399778        | 4.4135094            | 8.0664463        |
| Zewdie et al      | 6.6285348        | 4.8085175            | 8.4485521        |
| <b>Combined</b>   | <b>6.2324784</b> | <b>4.4448835</b>     | <b>8.0200733</b> |

**Figure S4C.** Results of a sensitivity analysis assessing the between-study heterogeneity in estimating the weighted pooled prevalence of INH mono-resistance.



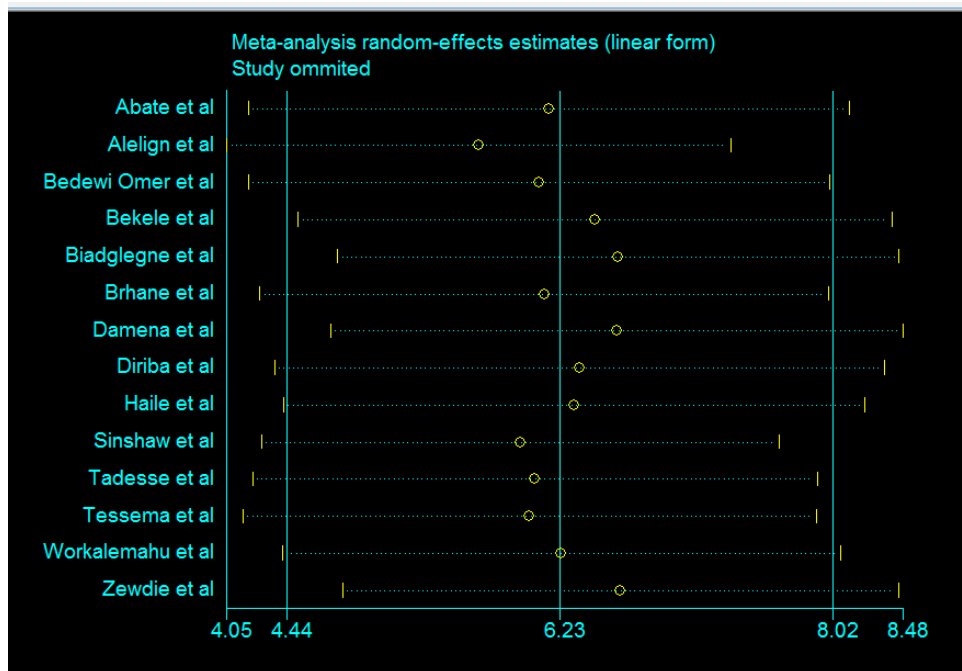

**Figure S4D.** Results of a sensitivity analysis assessing the between-study heterogeneity in estimating the weighted pooled prevalence of INH mono-resistance.

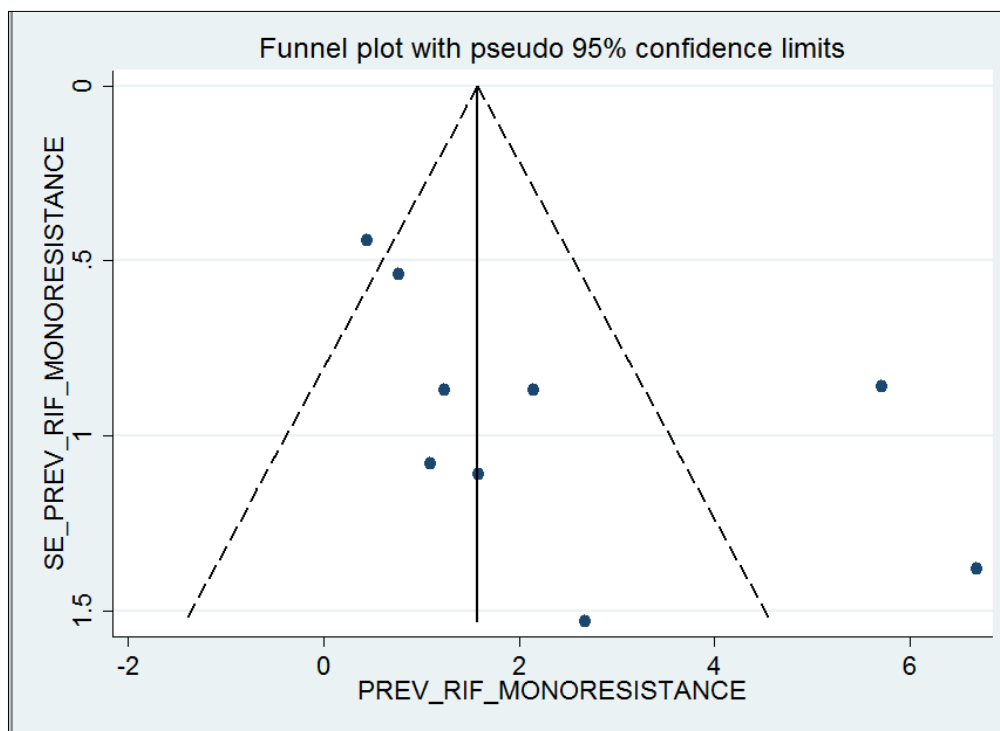

**Figure S5A.** Funnel plot for publication bias, PREV (prevalence) of RIF-mono-resistance represented in the x-axis and SE (standard error) of the prevalence of any RIF-mono-resistance in the y-axis.

| Tests for Publication Bias   |           |                        |       |       |                      |          |
|------------------------------|-----------|------------------------|-------|-------|----------------------|----------|
| Begg's Test                  |           |                        |       |       |                      |          |
| adj. Kendall's Score (P-Q) = | 15        |                        |       |       |                      |          |
| Std. Dev. of Score =         | 9.54      | (corrected for ties)   |       |       |                      |          |
| Number of Studies =          | 9         |                        |       |       |                      |          |
| z =                          | 1.57      |                        |       |       |                      |          |
| Pr >  z  =                   | 0.116     |                        |       |       |                      |          |
| z =                          | 1.47      | (continuity corrected) |       |       |                      |          |
| Pr >  z  =                   | 0.142     | (continuity corrected) |       |       |                      |          |
| Egger's test                 |           |                        |       |       |                      |          |
| Std_Eff                      | Coef.     | Std. Err.              | t     | P> t  | [95% Conf. Interval] |          |
| slope                        | -1.051054 | 1.341061               | -0.78 | 0.459 | -4.22216             | 2.120053 |
| bias                         | 3.705042  | 1.743399               | 2.13  | 0.071 | -.4174408            | 7.827525 |

**Figure S5B.** The results of Begg's and Egger's tests for publication bias, in estimating the weighted pooled prevalence of RIF-mono-resistance.

| Study omitted     | Coef.            | [95% Conf. Interval] |                  |
|-------------------|------------------|----------------------|------------------|
| Abate et al       | 1.7387358        | .69534922            | 2.7821224        |
| Bedewi Omer et al | 2.3714638        | .87437099            | 3.8685567        |
| Bekele et al      | 2.491853         | .99005461            | 3.9936512        |
| Biadglegne et al  | 2.6374092        | 1.1291921            | 4.1456261        |
| Diriba et al      | 1.8761458        | .66537589            | 3.0869157        |
| Haile et al       | 2.4900289        | 1.0243262            | 3.9557316        |
| Tadesse et al     | 2.3043659        | .88516986            | 3.723562         |
| Tessema et al     | 2.591362         | 1.0064106            | 4.1763134        |
| Wondale et al     | 2.4294624        | .96440083            | 3.8945239        |
| <b>Combined</b>   | <b>2.3297366</b> | <b>1.0001319</b>     | <b>3.6593414</b> |

**Figure S5C.** Results of a sensitivity analysis assessing the between-study heterogeneity in estimating the weighted pooled prevalence of RIF mono-resistance.

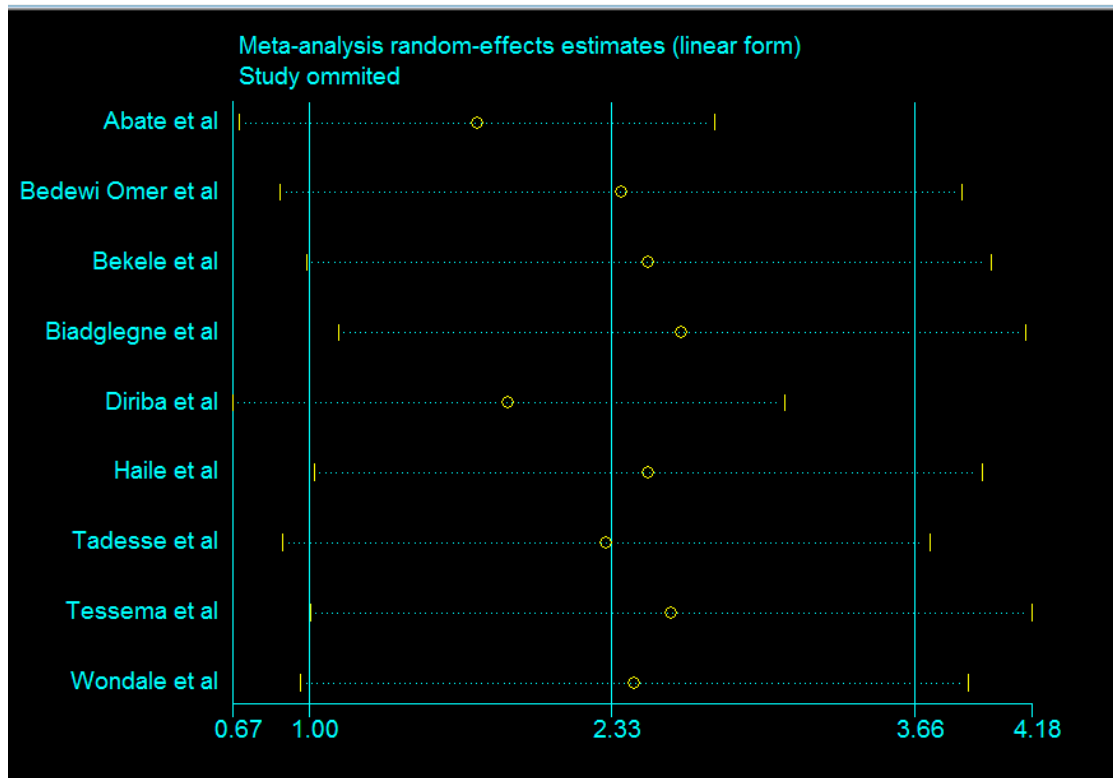

Figure S5D. Results of a sensitivity analysis assessing the between-study heterogeneity in estimating the weighted pooled prevalence of RIF mono-resistance.

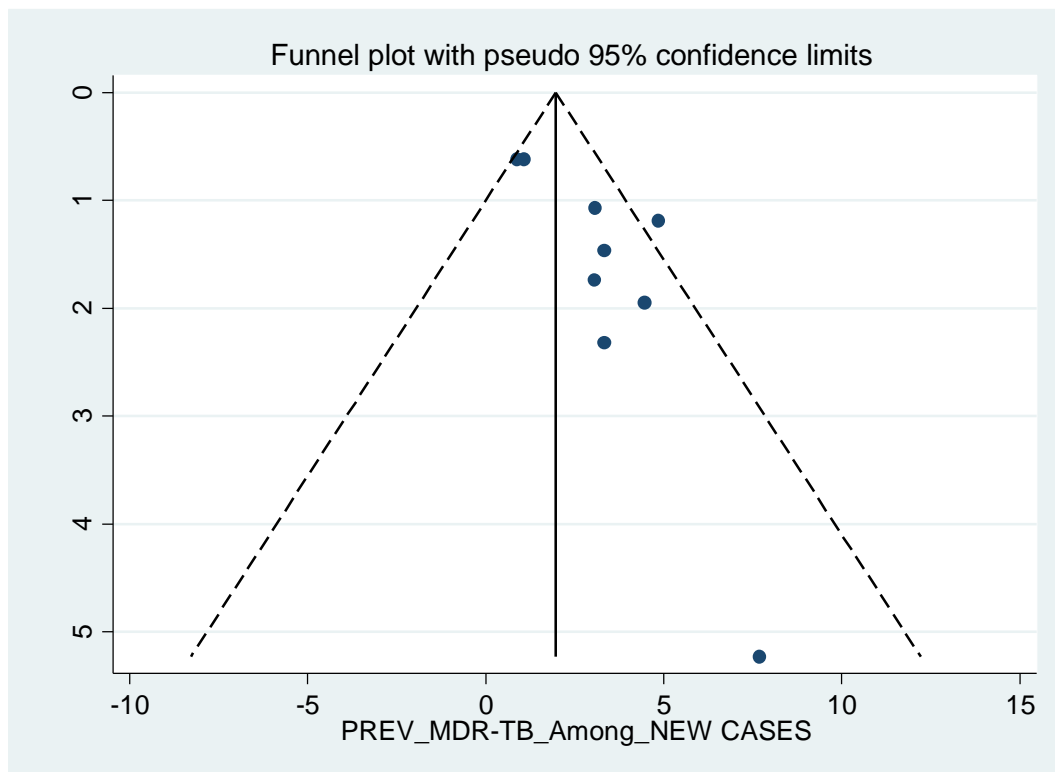

Figure S6A. Funnel plot for publication bias, PREV (prevalence) of MDR-TB among new cases represented in the x-axis, and SE (standard error) of the prevalence of MDR-TB among new cases in the y-axis.

Tests for Publication Bias

Begg's Test

adj. Kendall's score (P-Q) = 7  
 Std. Dev. of Score = 9.54 (corrected for ties)  
 Number of Studies = 9  
 z = 0.73  
 Pr > |z| = 0.463  
 z = 0.63 (continuity corrected)  
 Pr > |z| = 0.529 (continuity corrected)

Egger's test

| Std_Eff | Coef.     | Std. Err. | t     | P> t  | [95% Conf. Interval] |          |
|---------|-----------|-----------|-------|-------|----------------------|----------|
| slope   | -.0185747 | .6630288  | -0.03 | 0.978 | -1.586389            | 1.549239 |
| bias    | 2.164214  | .627485   | 3.45  | 0.011 | .6804475             | 3.64798  |

**Figure S6B.** The results of Begg's and Egger's tests for publication bias, in estimating the weighted pooled prevalence of MDR-TB among new cases.

Meta-analysis

| Method | Pooled Est | 95% CI |       | Asymptotic |         | No. of studies |
|--------|------------|--------|-------|------------|---------|----------------|
|        |            | Lower  | Upper | z_value    | p_value |                |
| Fixed  | 1.966      | 1.275  | 2.656 | 5.581      | 0.000   | 9              |
| Random | 2.643      | 1.465  | 3.821 | 4.397      | 0.000   |                |

Test for heterogeneity: Q= 16.544 on 8 degrees of freedom (p= 0.035)  
 Moment-based estimate of between studies variance = 1.384

Trimming estimator: Linear  
 Meta-analysis type: Random-effects model

| iteration | estimate | Tn | # to trim | diff |
|-----------|----------|----|-----------|------|
| 1         | 2.643    | 34 | 3         | 45   |
| 2         | 1.756    | 42 | 5         | 16   |
| 3         | 1.519    | 42 | 5         | 0    |

Filled  
 Meta-analysis

| Method | Pooled Est | 95% CI |       | Asymptotic |         | No. of studies |
|--------|------------|--------|-------|------------|---------|----------------|
|        |            | Lower  | Upper | z_value    | p_value |                |
| Fixed  | 1.423      | 0.794  | 2.052 | 4.435      | 0.000   | 14             |
| Random | 1.638      | 0.477  | 2.800 | 2.764      | 0.006   |                |

Test for heterogeneity: Q= 31.745 on 13 degrees of freedom (p= 0.003)  
 Moment-based estimate of between studies variance = 2.325

**Figure S6C.** The trim and fill analysis result for publication bias, in estimating the weighted pooled prevalence of MDR-TB among new cases.

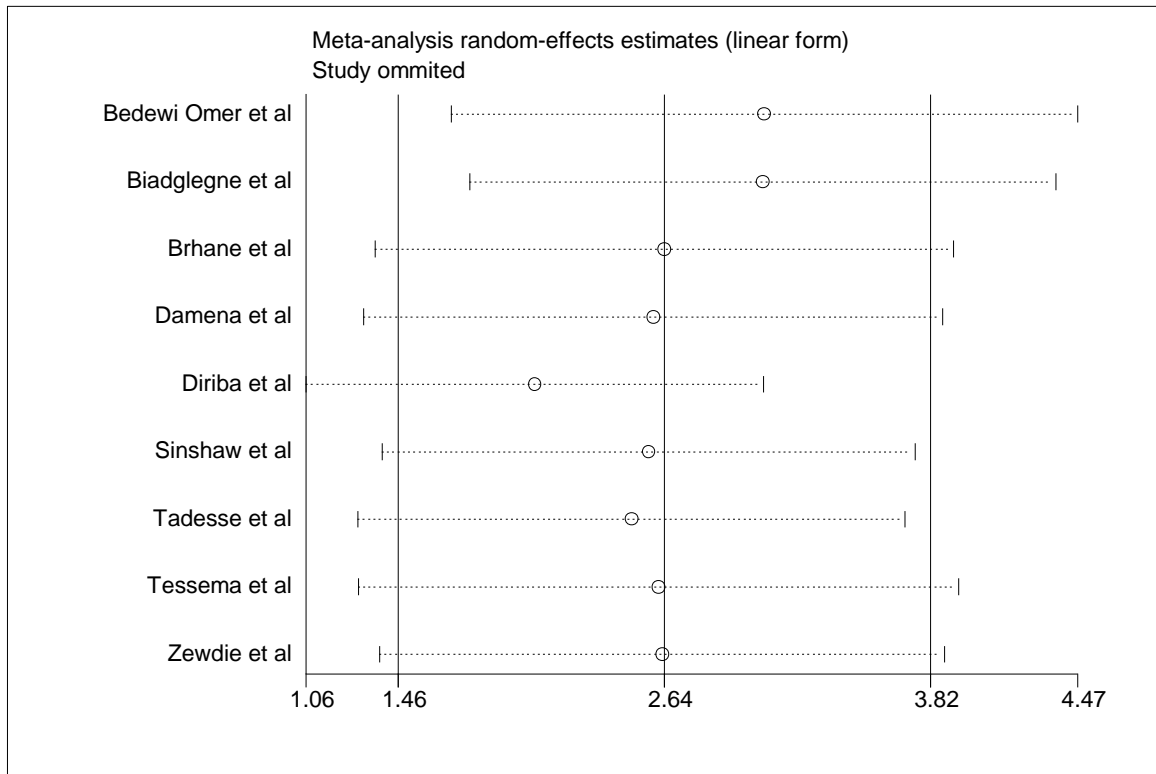

**Figure S6D.** Results of a sensitivity analysis assessing the between-study heterogeneity in estimating the weighted pooled prevalence of MDR-TB among new cases.

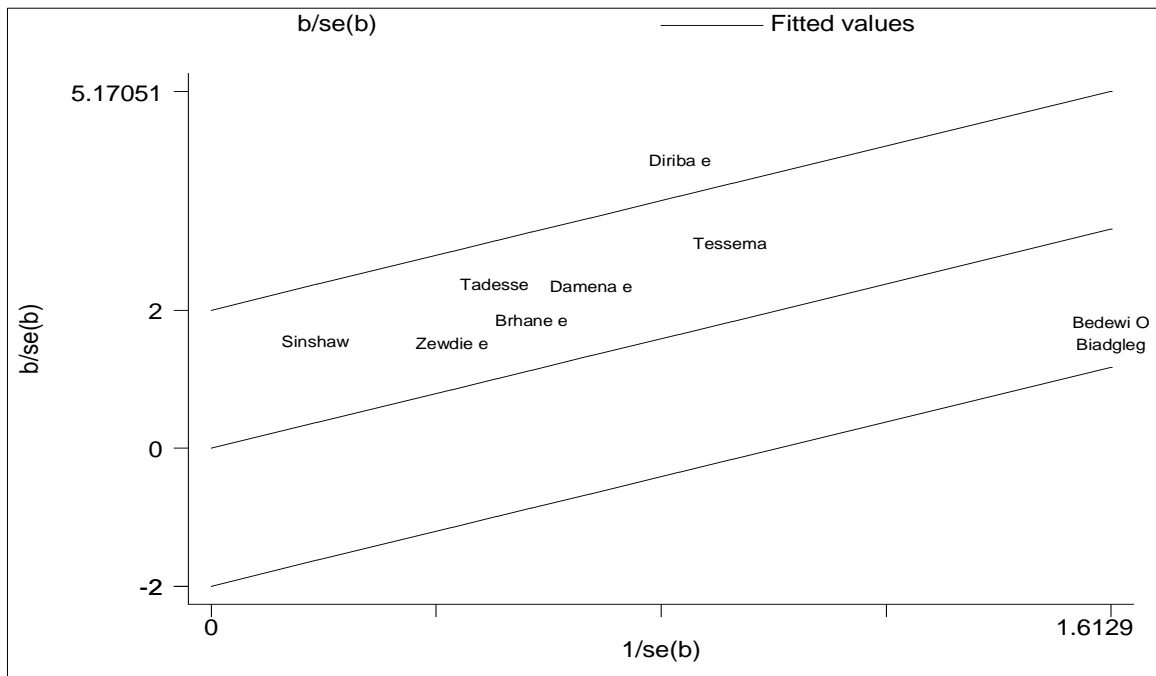

**Figure S6E.** Results of a sensitivity analysis assessing the between-study heterogeneity in estimating the weighted pooled prevalence of MDR-TB among new cases.

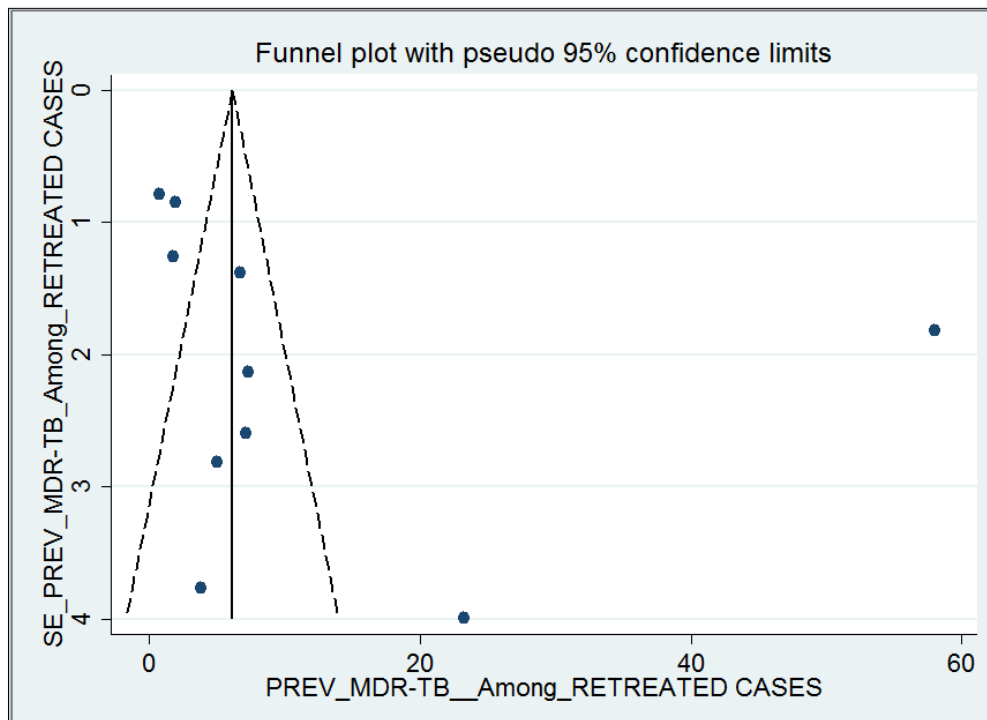

**Figure S7A.** Funnel plot for publication bias, PREV(prevalence) of MDR-TB among retreated cases represented in the x-axis, and SE (standard error) of the prevalence of MDR-TB among retreated cases in the y-axis.

Tests for Publication Bias

Begg's Test

adj. Kendall's Score (P-Q) = 17  
 Std. Dev. of Score = 11.18  
 Number of Studies = 10  
 z = 1.52  
 Pr > |z| = 0.128  
 z = 1.43 (continuity corrected)  
 Pr > |z| = 0.152 (continuity corrected)

Egger's test

| Std_Eff | Coef.     | Std. Err. | t     | P> t  | [95% Conf. Interval] |          |
|---------|-----------|-----------|-------|-------|----------------------|----------|
| slope   | -3.329322 | 9.056901  | -0.37 | 0.723 | -24.21457            | 17.55593 |
| bias    | 7.698069  | 6.449778  | 1.19  | 0.267 | -7.175145            | 22.57128 |

**Figure S7B.** The results of Begg's and Egger's tests for publication bias, in estimating the weighted pooled prevalence of MDR-TB among retreated cases.

| Study ommited   | Coef.            | [95% Conf. Interval]       |
|-----------------|------------------|----------------------------|
| Abate et al     | 5.2948809        | 2.6722052 7.9175563        |
| Alelign et al   | 12.643049        | 1.8209696 23.465128        |
| Brhane et al    | 12.024216        | 1.8749261 22.173506        |
| Damena et al    | 12.008809        | 1.7462465 22.271372        |
| Diriba et al    | 12.089459        | 1.3518326 22.827087        |
| Sinshaw et al   | 12.358165        | 2.3422689 22.37406         |
| Tadesse et al   | 10.300491        | .39830282 20.202681        |
| Tessema et al   | 12.635528        | .90150845 24.369547        |
| Wondale et al   | 12.763624        | 1.0636098 24.46364         |
| Zewdie et al    | 12.256725        | 2.1419365 22.371513        |
| <b>Combined</b> | <b>11.536382</b> | <b>2.1170587 20.955706</b> |

Figure S7C. Results of a sensitivity analysis assessing the between-study heterogeneity in estimating the weighted pooled prevalence of MDR-TB among retreated cases.

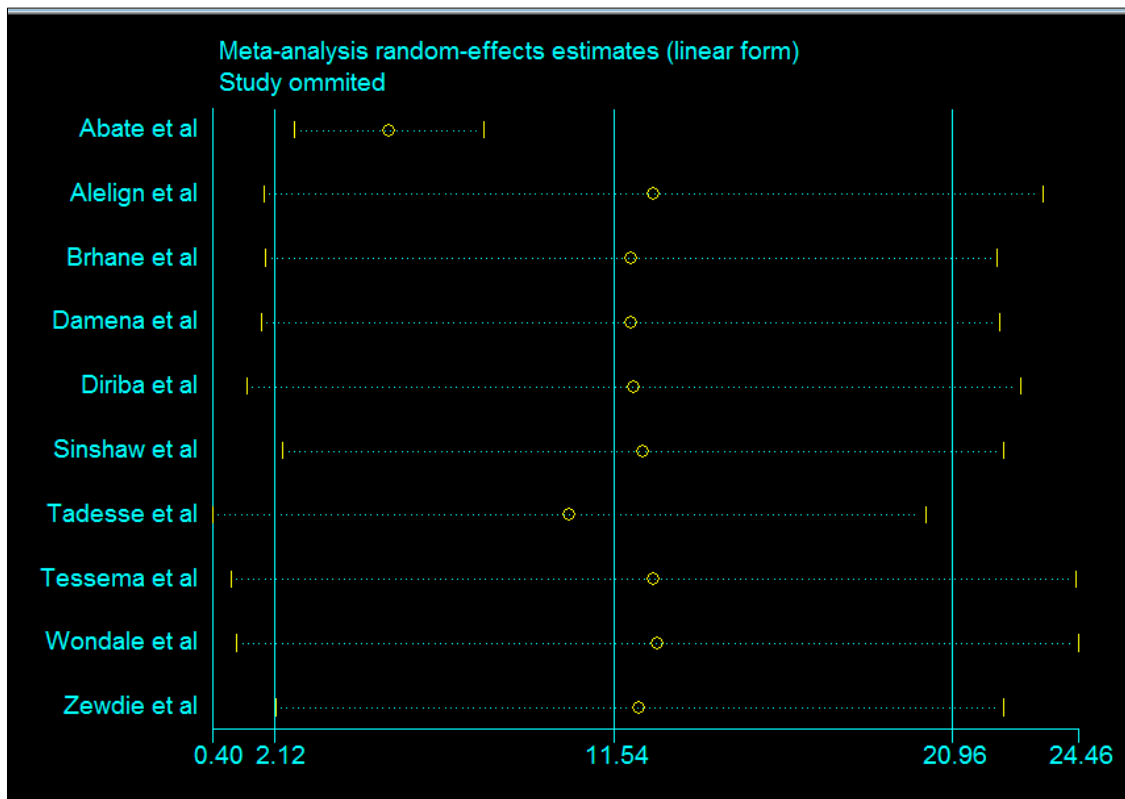

Figure S7D. Results of a sensitivity analysis assessing the between-study heterogeneity in estimating the weighted pooled prevalence of MDR-TB among retreated cases.

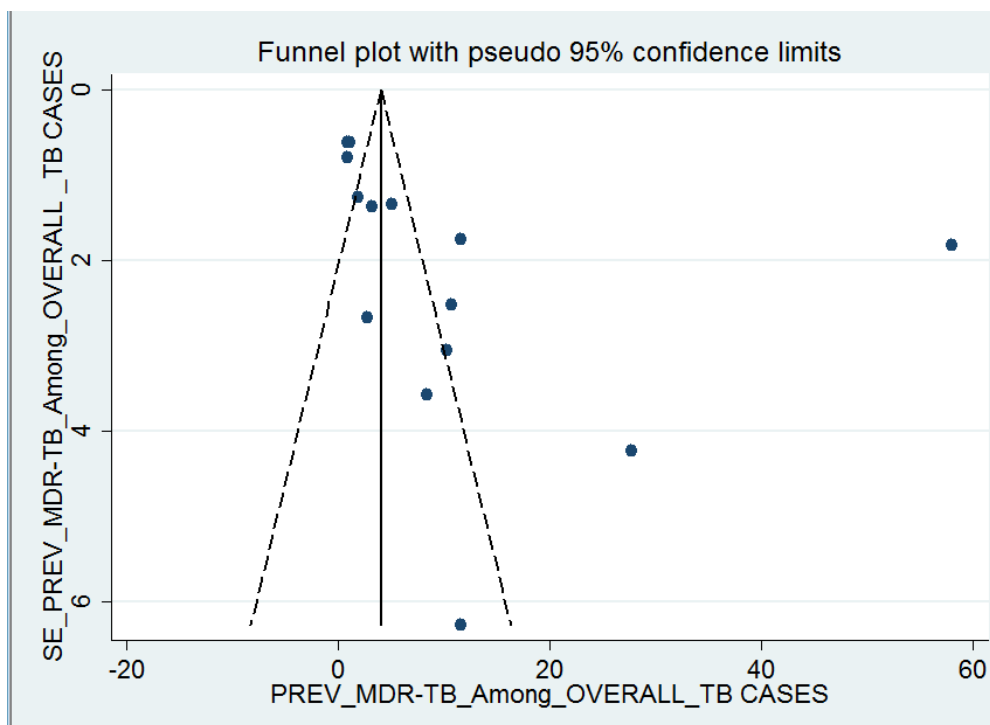

**Figure S8A.** Funnel plot for publication bias, PREV (prevalence) of MDR-TB among overall TB cases represented in the x-axis, and SE (standard error) of the prevalence of MDR-TB among overall TB cases in the y-axis.

Tests for Publication Bias

Begg's Test

adj. Kendall's Score (P-Q) = **48**  
 Std. Dev. of Score = **18.24** (corrected for ties)  
 Number of Studies = **14**  
 z = **2.63**  
 Pr > |z| = **0.008**  
 z = **2.58** (continuity corrected)  
 Pr > |z| = **0.010** (continuity corrected)

Egger's test

| Std_Eff | Coef.            | Std. Err.       | t            | P> t         | [95% Conf. Interval] |                 |
|---------|------------------|-----------------|--------------|--------------|----------------------|-----------------|
| slope   | <b>-2.934549</b> | <b>4.665809</b> | <b>-0.63</b> | <b>0.541</b> | <b>-13.10047</b>     | <b>7.231374</b> |
| bias    | <b>6.972379</b>  | <b>3.884858</b> | <b>1.79</b>  | <b>0.098</b> | <b>-1.491999</b>     | <b>15.43676</b> |

**Figure S8B.** The results of Begg's and Egger's tests for publication bias, in estimating the weighted pooled prevalence of MDR-TB among overall TB cases.



| Study omitted     | Coef.            | [95% Conf. Interval]       |
|-------------------|------------------|----------------------------|
| Abate et al       | 5.6974387        | 3.4588323 7.9360447        |
| Alelign et al     | 11.517895        | 4.9541521 18.081636        |
| Bedewi Omer et al | 11.607622        | 4.3049107 18.910334        |
| Bekele et al      | 11.409986        | 4.8829365 17.937037        |
| Biadglegne et al  | 11.623203        | 4.3359981 18.910408        |
| Brhane et al      | 10.829391        | 4.5218172 17.136963        |
| Damena et al      | 10.794916        | 4.4681644 17.121668        |
| Diriba et al      | 10.727485        | 4.3564563 17.098513        |
| Fanosie et al     | 11.407612        | 5.0691738 17.74605         |
| Sinshaw et al     | 10.737627        | 4.5007482 16.974506        |
| Tadesse et al     | 9.587923         | 3.4001679 15.775679        |
| Tessema et al     | 11.259382        | 4.7253251 17.79344         |
| Wondale et al     | 11.618974        | 4.6620841 18.575863        |
| Zewdie et al      | 10.965412        | 4.6682591 17.262566        |
| <b>Combined</b>   | <b>10.783221</b> | <b>4.7379156 16.828526</b> |

Figure S8C. Results of a sensitivity analysis assessing the between-study heterogeneity in estimating the weighted pooled prevalence of MDR-TB among overall TB cases.

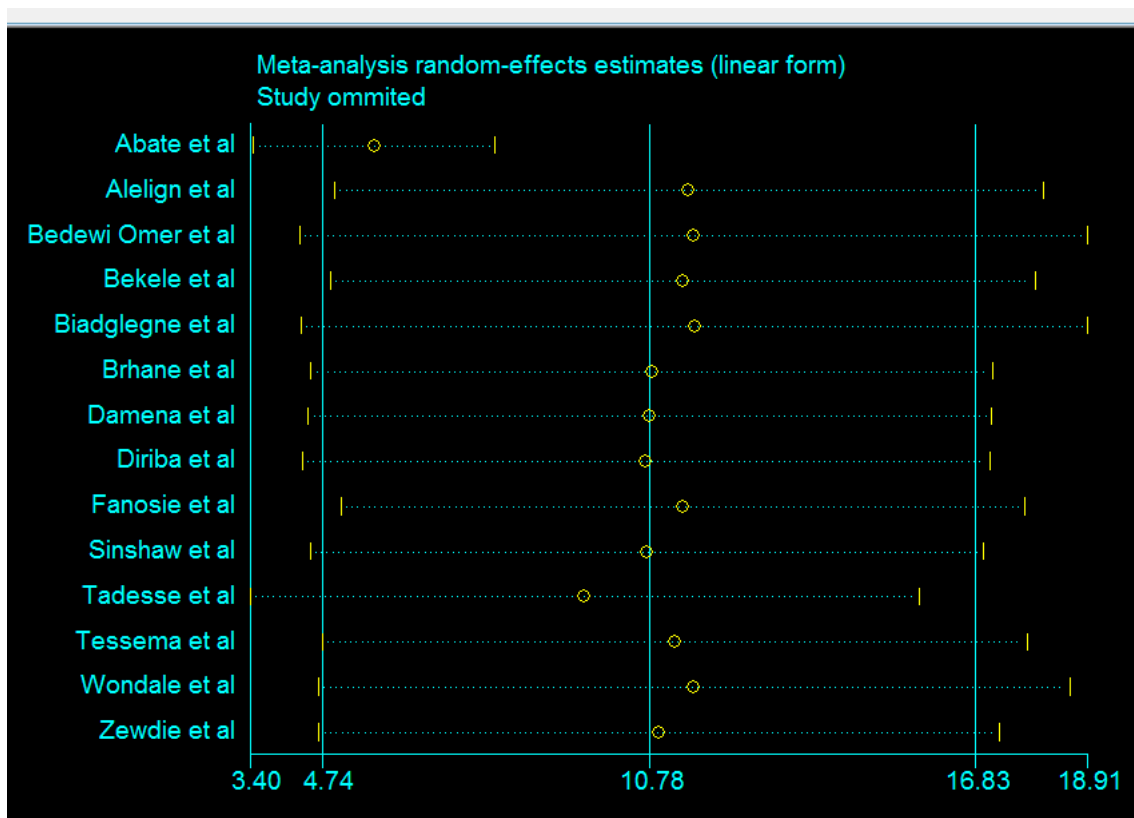

Figure S8D. Results of a sensitivity analysis assessing the between-study heterogeneity in estimating the weighted pooled prevalence of MDR-TB among overall TB cases.
