# Supplementary material for: Mycobacterium tuberculosis Drug Resistance in Ethiopia: An Updated Systematic Review and Meta-Analysis
Source: Trop Med Infect Dis. 2022 Oct 14;7(10):300. doi: 10.3390/tropicalmed7100300 (PMC9611116; doi:10.3390/tropicalmed7100300)
Supplement: Supplementary file 1 [file tropicalmed-07-00300-s001.zip]

Archive with 4 entries (4 files):
- tropicalmed-1879113-figure .pdf
- tropicalmed-1879113-Table S1.pdf
- tropicalmed-1879113-Table S2.pdf
- tropicalmed-1879113-Table S3.pdf
